# Supplementary material for: Surfactant and alcohol induced disaggregation of perylene probes and a novel sensing strategy for distinguishing the brand and authenticity of makeup removers
Source: Royal Society of Chemistry journal article supplement (doi:10.1039/d0nj03647a), 2020-01-01
Supplement: d0nj03647a1.pdf [file d0nj03647a1.pdf]

## Supporting Information

Surfactants and alcohols induced disaggregation of perylene probes and a  
novel sensing strategy for distinguishing the brand and authenticity of  
makeup remover

Jiaze Hou<sup>a,b</sup>, Yongxin Li<sup>a,c,\*</sup>, Huipeng Zhou<sup>a</sup>, Ling Zhang<sup>b</sup>, Hui Huang<sup>b</sup>, Muhammad  
Azhar Hayat Nawaz<sup>a,d</sup>, Cong Yu<sup>a,d,\*</sup>

<sup>a</sup>State Key Laboratory of Electroanalytical Chemistry, Changchun Institute of Applied  
Chemistry, Chinese Academy of Sciences, Changchun, 130022, P. R. China

<sup>b</sup>College of Food Science and Engineering, Jilin University, Changchun, 130025, P. R.  
China

<sup>c</sup>College of New Energy and Environment, Jilin University, Changchun 130021, P. R.  
China

<sup>d</sup>University of Science and Technology of China, Hefei, 230026, P. R. China

\*Corresponding authors

E-mail: liyongxin@jlu.edu.cn; congyu@ciac.ac.cn

## Synthesis of the perylene probes

Probe 1 and Probe 3 were synthesized according to our previous work [S1-S2]. Probe 2 and Probe 4 were designed and synthesized according to the following route (Fig. S1, Supporting Information).

Synthesis of compound 1: Perylene-3,4,9,10-tetracarboxylic acid dianhydride (3 g, 7.6 mmol) was stirred in KOH solution (5%, 35 mL) for 4 h at 90 °C. After cooling to room temperature, 12.5 mL H<sub>3</sub>PO<sub>4</sub> (10%) was added and stirred for 1 h at 90 °C. The precipitate formed was filtered, washed with water and dried in vacuum at 100 °C.

Synthesis of compound 2: Compound 1 (1 g, 2.2 mmol), N,N-dimethylpropane-1,3-diamine (11 mmol), and water (50 mL) were stirred at 0-5 °C for 4 h. After stirring the mixture at 90 °C for 2 h, potassium carbonate (25%, 12.5 mL) was added and stirred for another 1 h at 90 °C. The precipitate was collected by vacuum filtration and washed with potassium carbonate (2%). The precipitate was dissolved in KOH (3.5%, 100 mL), heated to 90 °C, kept at this temperature for 5 min and filtered while hot. After acidification with hydrochloric acid (10%), the precipitate was collected by vacuum filtration and dried in vacuum at 100 °C.

Synthesis of compound 3: Compound 2 (1.55 g, 3.25 mmol) was added to 3-methylpyridine (50 mL) with stirring under nitrogen. Copper powder (2.0 g, 31.5 mmol) was added and the mixture heated at 160 °C for 48 h under a nitrogen

atmosphere. The reaction mixture was cooled, poured into aqueous saturated ammonium chloride solution (50 mL). The mixture was extracted with chloroform for two times (100 mL). The combined organic fractions were washed with aqueous saturated ammonium chloride solution then water and subsequently dried (anhyd.  $\text{Na}_2\text{SO}_4$ ). The solution was filtered and the solvent was evaporated giving an orange green solid, which was subjected to column chromatography ( $\text{SiO}_2/\text{CH}_2\text{Cl}_2$ ). The product was collected as the first intense orange band. Evaporation of the solvent gave a red solid, which was dried in vacuum and used without further purification.

Synthesis of Probe 2: 1.0 g of the obtained compound 3 and 4.5 mL of methyl iodide were added to 150 mL of toluene, refluxed for 3 h under  $\text{N}_2$  atmosphere. After the mixture was cooled to room temperature, the precipitate was filtered and washed with ether and dried under vacuum to give the final product (Probe 2).  $^1\text{H}$  NMR (400 MHz, TFA)  $\delta$  8.50 (d,  $J = 44.5$  Hz, 3H), 8.30 (d,  $J = 17.0$  Hz, 3H), 7.76 (s, 2H), 7.46 (s, 2H), 4.34 (s, 2H), 3.49 (s, 2H), 3.02 (s, 9H), 2.30 (s, 2H).

Synthesis of compound 4: Compound 1 (1 g, 2.2 mmol), 3-amino-1-propanol (11 mmol) and water (50 mL) were stirred at 0-5 °C for 4 h. After stirring the mixture at 90 °C for 2 h, potassium carbonate (25%, 12.5 mL) was added and stirred for another 1 h at 90 °C. The precipitate was collected by vacuum filtration and washed with potassium carbonate (2%). The precipitate was dissolved in KOH (3.5%, 100 mL), heated to 90 °C, kept at this temperature for 5 min and filtered while hot. After

acidification with hydrochloric acid (10%), the precipitate was collected by vacuum filtration and dried in vacuum at 100 °C.

Synthesis of Probe 4: Into a 50 ml Schlenk flask were charged aminocaproic acid (21 mmol), compound 4 (4.51 g, 10 mmol), and imidazole (28 g). The mixture was purged with argon for 15 minutes before being heated at 120 °C until the reaction mixture was completely soluble in water. Subsequently, the reaction mixture was cooled to 90 °C. Deionized water was then added under argon atmosphere. The dark red solution was filtered to remove the trace amount of unreacted compound 4. The solution was then acidified with 2 M HCl aqueous solution to a pH value of 3-4, the precipitate was collected by suction-filtration and thoroughly washed with deionized water until the filtrate was neutral; the red solid was collected and dried at 75 °C in vacuum oven until constant weight. <sup>1</sup>H NMR (500 MHz, TFA-d1) δ 8.27 (s, 8H), 7.07 (s, 1H), 4.18 (d, J = 59.7 Hz, 2H), 3.93 (s, 2H), 2.17 (s, 2H), 1.91 (d, J = 80.2 Hz, 2H), 1.48 (s, 6H), 1.22 (s, 2H).

#### References:

- [S1] J. Li, H. Zhou, Y. Zhang, S.A. Shahzad, M. Yang, Z. Hu, et al., Tuning of the perylene probe excimer emission with silver nanoparticles, *Anal. Chim. Acta* 1016 (2018) 40-48.
- [S2] Y. Wang, J. Chen, Y. Chen, W. Li, C. Yu, Polymer-Induced Perylene Probe Excimer Formation and Selective Sensing of DNA Methyltransferase Activity through the Monomer–Excimer Transition, *Anal. Chem.* 86 (2014) 4371-4378.

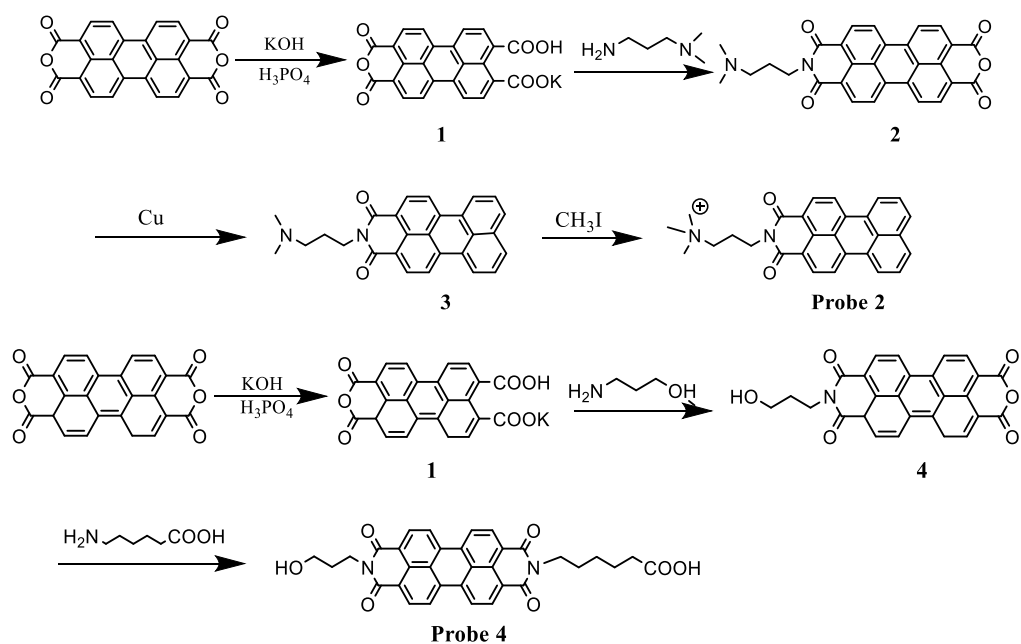

**Fig. S1.** The synthetic routes for Probe 2 and Probe 4.

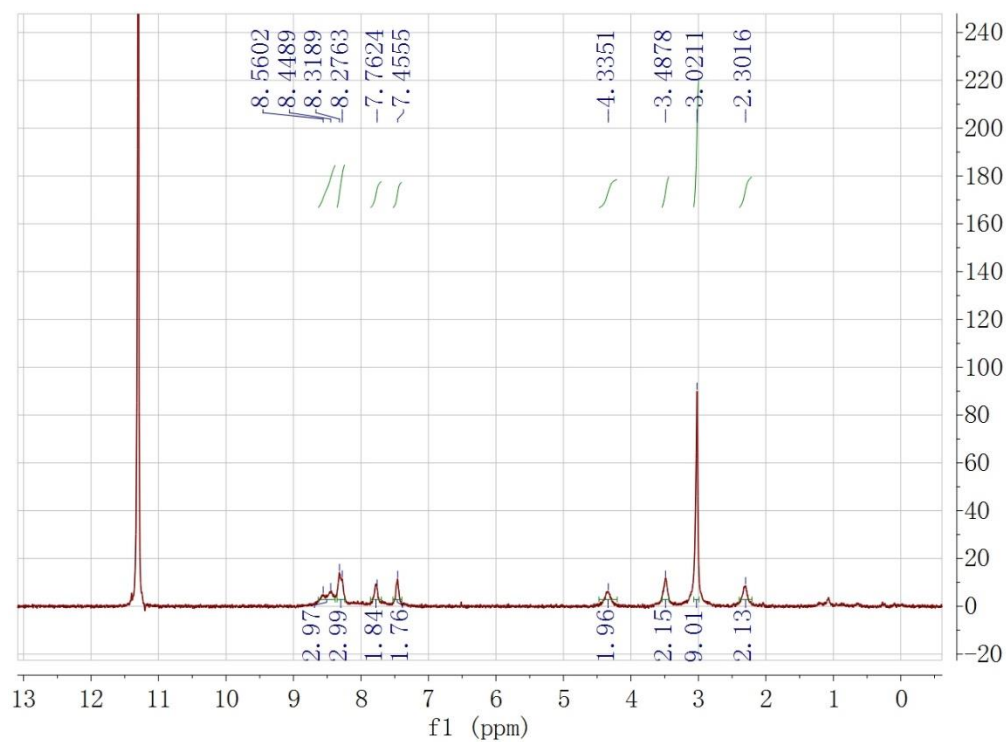

**Fig. S2.**  $^1\text{H}$  NMR of Probe 2.

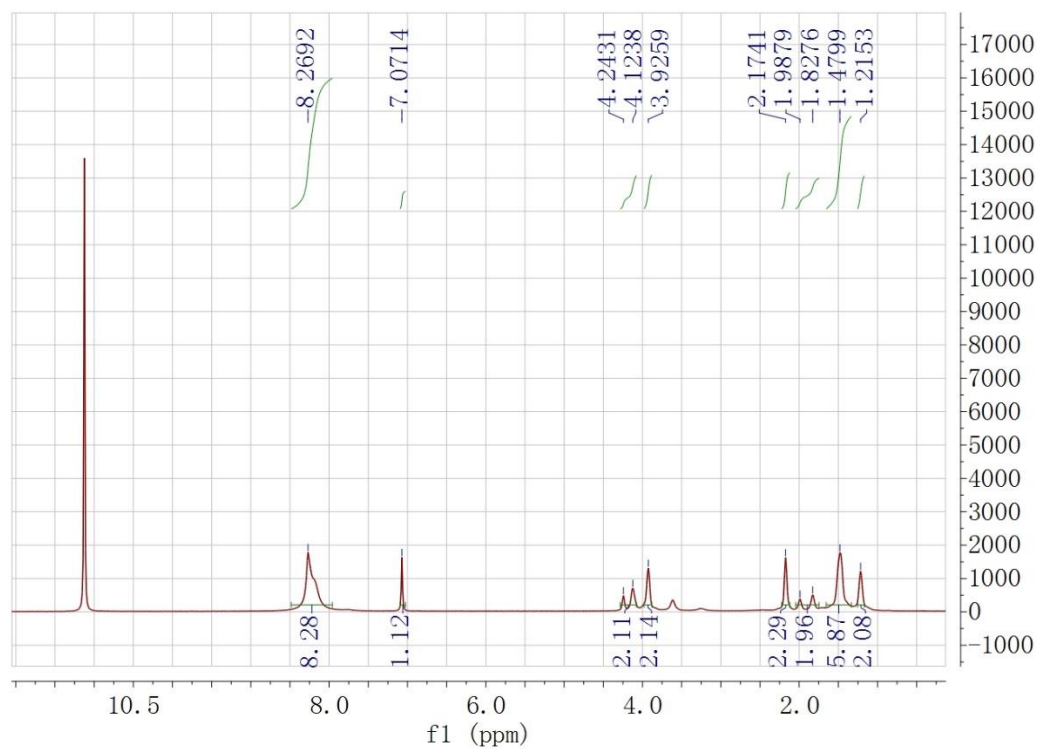

**Fig. S3.**  $^1\text{H}$  NMR of Probe 4.

**Table S1.** LDA data for the discrimination of surfactants.

|             | 20 mM     |          | 10 mM     |          |
|-------------|-----------|----------|-----------|----------|
|             | Factor 1  | Factor 2 | Factor 1  | Factor 2 |
| <b>CTAB</b> | -31.48532 | 1.24763  | -31.30503 | 10.55773 |
|             | -28.9016  | 3.45186  | -31.57726 | 11.33069 |
|             | -32.18633 | 1.52518  | -31.93007 | 7.50043  |
|             | -30.11394 | 3.43722  | -31.96094 | 10.06688 |
|             | -30.12112 | 0.58024  | -32.07319 | 7.5571   |
|             | -30.95573 | 4.99127  | -31.87894 | 10.31291 |
| <b>SDS</b>  | 111.74399 | -3.30119 | 135.86123 | -0.06282 |
|             | 113.01914 | -3.58808 | 133.85231 | -1.1341  |
|             | 110.42551 | -1.06808 | 138.54591 | -3.34429 |
|             | 110.7114  | -2.7588  | 132.77375 | -2.78775 |
|             | 114.74032 | -1.65996 | 133.28009 | -2.36906 |

|                     |                 |                 |                 |                 |
|---------------------|-----------------|-----------------|-----------------|-----------------|
|                     | 113.83278       | -3.37952        | 136.17325       | -3.1518         |
| <b>Triton X-100</b> | -28.74102       | -27.84534       | -43.21983       | -16.45541       |
|                     | -28.58347       | -27.95542       | -43.22675       | -16.51893       |
|                     | -28.79174       | -27.73725       | -43.19626       | -16.32766       |
|                     | -28.89471       | -27.82518       | -43.20041       | -16.51003       |
|                     | -28.75465       | -27.83527       | -43.21547       | -16.53051       |
|                     | -29.05829       | -27.55559       | -43.22295       | -16.59119       |
| <b>Tween-20</b>     | -18.48819       | 31.62202        | -22.95483       | 15.52216        |
|                     | -18.40302       | 32.40364        | -22.67402       | 15.9257         |
|                     | -18.73485       | 32.28094        | -22.69277       | 15.80026        |
|                     | -18.7664        | 34.53052        | -23.44966       | 13.96437        |
|                     | -17.45656       | 32.74928        | -22.82508       | 15.01242        |
|                     | -17.21743       | 32.27319        | -22.74226       | 15.24299        |
| <b>Tween-80</b>     | -35.37282       | -4.4865         | -37.1454        | -5.85015        |
|                     | -34.69704       | -4.49344        | -36.9562        | -5.74801        |
|                     | -35.15572       | -4.71789        | -36.8852        | -5.74929        |
|                     | -34.72216       | -5.28915        | -37.4005        | -6.62413        |
|                     | -34.54389       | -4.9063         | -37.42914       | -6.63925        |
|                     | -34.32713       | -4.69001        | -37.32439       | -6.39924        |
|                     |                 |                 |                 |                 |
|                     |                 |                 |                 |                 |
| <b>CTAB</b>         | <b>1 mM</b>     |                 | <b>0.5 mM</b>   |                 |
|                     | <b>Factor 1</b> | <b>Factor 2</b> | <b>Factor 1</b> | <b>Factor 2</b> |
|                     | 19.6495         | 0.96303         | 39.22931        | -2.93253        |
|                     | 22.24078        | 1.42895         | 41.56526        | -1.93078        |
|                     | 23.3498         | 1.25648         | 39.43084        | -2.19926        |
|                     | 20.30619        | 0.2367          | 41.40187        | -2.85156        |
|                     | 23.96941        | 0.53881         | 36.95558        | -1.69622        |
| <b>SDS</b>          | 24.93029        | 1.25869         | 42.47401        | -2.90497        |
|                     | -0.73476        | -12.24197       | -15.02223       | -5.22659        |
|                     | -1.8583         | -12.07254       | -16.10874       | -5.76411        |
|                     | -2.02223        | -11.6807        | -16.3955        | -6.01103        |
|                     | -2.33362        | -11.49291       | -16.63094       | -6.67525        |
|                     | -2.70709        | -11.47444       | -17.00978       | -7.29708        |
|                     | -2.85596        | -11.72174       | -17.23188       | -7.57628        |
| <b>Triton X-100</b> | -9.41936        | -4.40925        | -15.51192       | -2.3512         |
|                     | -9.21375        | -5.65236        | -15.34898       | -2.08047        |
|                     | -9.31227        | -5.33401        | -15.55566       | -2.71361        |
|                     | -9.09583        | -6.20258        | -15.53243       | -2.13724        |

|                 |          |          |           |          |
|-----------------|----------|----------|-----------|----------|
|                 | -9.06636 | -6.36012 | -15.47769 | -2.25243 |
|                 | -9.25366 | -5.20331 | -15.49259 | -2.11421 |
| <b>Tween-20</b> | -2.22663 | 7.79379  | 0.66792   | 3.70456  |
|                 | -1.98696 | 9.22954  | 0.68907   | 4.07803  |
|                 | -2.05527 | 9.1148   | 0.30715   | 4.84659  |
|                 | -1.90157 | 5.58302  | 0.25165   | 7.96707  |
|                 | -2.25181 | 5.93911  | 0.28921   | 7.36748  |
|                 | -2.36543 | 6.13374  | 0.22785   | 7.16241  |
| <b>Tween-80</b> | -9.11776 | 9.71944  | -8.90017  | 4.72965  |
|                 | -8.81123 | 7.64008  | -9.33753  | 4.5508   |
|                 | -8.7849  | 7.41842  | -9.06895  | 5.08055  |
|                 | -9.00347 | 9.44059  | -8.24822  | 6.14803  |
|                 | -9.04184 | 9.86966  | -8.21982  | 5.46406  |
|                 | -9.02592 | 10.28104 | -8.39665  | 5.6156   |

**Table S2.** LDA data for the discrimination of alcohols.

|                        | 40%      |          | 20%       |          | 10%       |          |
|------------------------|----------|----------|-----------|----------|-----------|----------|
|                        | Factor 1 | Factor 2 | Factor 1  | Factor 2 | Factor 1  | Factor 2 |
| <b>Glycerin</b>        | -41.932  | -4.855   | -28.12893 | 2.57458  | -15.30084 | -4.08551 |
|                        | -42.072  | -4.577   | -27.99251 | 2.52225  | -14.14666 | -4.37926 |
|                        | -42.164  | -4.392   | -27.44946 | 2.11053  | -15.45775 | -4.64506 |
|                        | -42.048  | -4.742   | -27.35857 | 1.88532  | -15.81786 | -3.86923 |
|                        | -41.785  | -4.52    | -28.2619  | 2.35371  | -15.29815 | -4.04676 |
|                        | -42.224  | -4.485   | -27.77514 | 1.72896  | -14.28234 | -3.55918 |
| <b>Ethylene glycol</b> | -31.78   | 0.999    | -17.67421 | -1.02504 | -8.14719  | -1.04566 |
|                        | -32.614  | 2.021    | -16.97568 | -0.80234 | -8.56904  | -1.25377 |
|                        | -33.056  | 2.408    | -17.94975 | -1.65704 | -8.33587  | 0.06416  |
|                        | -32.99   | 2.514    | -16.35043 | -1.88073 | -9.85252  | -0.07238 |
|                        | -33.415  | 2.043    | -17.50507 | -1.31603 | -8.91472  | -1.35384 |
|                        | -33.085  | 2.001    | -17.43965 | -1.86759 | -9.38565  | 0.79765  |
| <b>Isopropanol</b>     | 46.725   | -5.935   | 23.29597  | 0.44624  | 7.01274   | -4.38721 |



|                             |         |        |           |          |           |          |
|-----------------------------|---------|--------|-----------|----------|-----------|----------|
|                             | 45.793  | -6.684 | 26.00403  | -0.11515 | 10.4157   | -4.92636 |
|                             | 43.799  | -9.304 | 25.03517  | -4.13102 | 6.82086   | -5.04171 |
|                             | 45.121  | -8.763 | 24.57012  | -1.48885 | 9.41816   | -4.71467 |
|                             | 45.055  | -6.349 | 24.47795  | -2.07805 | 5.31838   | -3.18409 |
|                             | 44.719  | -7.705 | 23.06997  | 1.2205   | 10.13718  | -1.52373 |
| <b>Methanol</b>             | -22.653 | 3.179  | -22.97898 | 6.17584  | -15.99899 | 5.29776  |
|                             | -24.91  | 4.228  | -21.26181 | 6.65625  | -15.08253 | 7.11728  |
|                             | -26.73  | 3.353  | -22.84753 | 5.63583  | -16.7751  | 5.31758  |
|                             | -23.775 | 1.888  | -22.84181 | 7.03489  | -16.07394 | 6.06813  |
|                             | -23.877 | 1.681  | -22.85078 | 4.92817  | -16.5055  | 4.11414  |
|                             | -24.042 | 1.046  | -22.85346 | 6.41724  | -15.13219 | 5.10182  |
| <b>Ethanol</b>              | 8.287   | 7.025  | -0.49977  | -4.30826 | 4.24166   | -1.07993 |
|                             | 6.566   | 6.811  | -1.46003  | -6.08594 | 3.28004   | 0.21642  |
|                             | 5.168   | 4.224  | -0.59616  | -4.97586 | 4.17508   | -1.54376 |
|                             | 8.023   | 4.97   | -3.25808  | -5.28597 | 3.31569   | -1.04035 |
|                             | 7.959   | 4.49   | -0.03754  | -5.70242 | 3.81457   | -2.69275 |
|                             | 8.765   | 4.733  | -2.55862  | -6.37019 | 3.13143   | -1.23867 |
| <b>Propylene<br/>glycol</b> | -9.667  | -3.047 | 2.19617   | -4.73299 | 14.26201  | 0.34942  |
|                             | -12.479 | -1.03  | 3.66223   | -4.87255 | 13.68229  | 0.01993  |
|                             | -13.198 | -1.714 | 3.70081   | -5.78908 | 14.41821  | -0.06467 |
|                             | -12.788 | -1.588 | 4.73234   | -5.93772 | 13.28279  | 1.01609  |
|                             | -12.484 | -0.689 | 3.91293   | -6.1324  | 14.691    | -0.72153 |
|                             | -11.761 | -1.077 | 4.88008   | -6.60151 | 15.18296  | 0.20845  |
| <b>Tert-butanol</b>         | 59.007  | 3.859  | 40.33157  | 5.66437  | 14.70763  | 2.84792  |
|                             | 59.189  | 5.199  | 43.33217  | 5.81353  | 14.43891  | 6.36069  |
|                             | 58.577  | 1.874  | 42.072    | 6.26588  | 12.86584  | 3.43049  |
|                             | 59.01   | 3.955  | 39.73619  | 4.60525  | 13.85892  | 3.54099  |
|                             | 58.137  | 3.664  | 39.24362  | 3.32002  | 13.68336  | 3.18325  |
|                             | 57.629  | 3.292  | 40.65254  | 5.79736  | 12.92145  | 5.41792  |

**Table S3.** LDA data for the discrimination of nine brands of commercial makeup removers (1-9) and common liquid goods (10-21).

|          | <b>Factor 1</b> | <b>Factor 2</b> |           | <b>Factor 1</b> | <b>Factor 2</b> |
|----------|-----------------|-----------------|-----------|-----------------|-----------------|
| <b>1</b> | -14.30902       | 42.39193        | <b>12</b> | -8.17729        | -8.70368        |
|          | -14.9273        | 40.90953        |           | -7.96452        | -8.9346         |
|          | -14.31264       | 41.32041        |           | -7.69833        | -8.25683        |
|          | -14.66724       | 40.72283        |           | -8.1499         | -8.98039        |
|          | -14.16157       | 40.53745        |           | -8.27082        | -8.48684        |
|          | -15.2074        | 39.71205        |           | -8.17367        | -9.17418        |
| <b>2</b> | 5.38446         | 18.5846         | <b>13</b> | -19.0293        | -18.38052       |
|          | 5.98473         | 18.44377        |           | -19.41856       | -18.32668       |
|          | 4.31702         | 16.39685        |           | -19.16997       | -18.39529       |
|          | 4.60351         | 18.411          |           | -19.09423       | -18.34069       |
|          | 4.30968         | 16.8516         |           | -19.18216       | -18.40341       |
|          | 4.33243         | 17.56129        |           | -19.37718       | -18.27613       |
| <b>3</b> | 136.79879       | -35.16523       | <b>14</b> | -11.44367       | -10.40085       |
|          | 136.00099       | -35.10596       |           | -12.03548       | -11.38446       |
|          | 130.51837       | -34.22401       |           | -11.56125       | -10.2336        |
|          | 133.02318       | -32.3344        |           | -11.94944       | -11.694         |
|          | 129.4244        | -33.50917       |           | -11.59907       | -10.39638       |
|          | 129.29262       | -32.38505       |           | -12.17743       | -12.41465       |
| <b>4</b> | 0.22913         | 27.52343        | <b>15</b> | -19.32127       | -15.97274       |
|          | -0.42856        | 25.19206        |           | -20.24242       | -15.87092       |
|          | -0.96846        | 26.15559        |           | -20.28796       | -16.04119       |
|          | -0.41229        | 27.98859        |           | -19.52587       | -15.89483       |
|          | -1.69618        | 23.82801        |           | -21.0053        | -15.94204       |
|          | -0.93797        | 26.66636        |           | -20.66699       | -15.6862        |
| <b>5</b> | -21.98823       | 11.40702        | <b>16</b> | -21.00586       | -17.00342       |
|          | -21.4989        | 11.24325        |           | -20.86043       | -16.90046       |
|          | -21.60231       | 12.21848        |           | -21.35004       | -16.90373       |
|          | -21.66981       | 11.1724         |           | -20.79829       | -16.92873       |
|          | -21.72077       | 12.05589        |           | -21.06381       | -16.94315       |
|          | -21.83324       | 10.76439        |           | -20.80707       | -16.90496       |
| <b>6</b> | 29.30031        | 66.96019        | <b>17</b> | -20.34277       | -15.96632       |
|          | 27.31523        | 59.79203        |           | -19.72317       | -16.44333       |
|          | 29.2044         | 67.36547        |           | -20.11816       | -15.89461       |
|          | 28.03668        | 63.19335        |           | -20.09855       | -16.4368        |

|           |           |           |           |           |           |
|-----------|-----------|-----------|-----------|-----------|-----------|
|           | 27.25821  | 65.06487  |           | -20.10927 | -15.84148 |
|           | 28.77945  | 62.84179  |           | -20.36973 | -16.50923 |
| <b>7</b>  | 59.24193  | 1.44869   | <b>18</b> | -22.2323  | -17.36188 |
|           | 57.95345  | 3.9291    |           | -20.83171 | -17.85766 |
|           | 60.52383  | 1.31988   |           | -21.86509 | -17.4847  |
|           | 54.4684   | 2.92047   |           | -21.08036 | -17.85086 |
|           | 60.37225  | 0.83121   |           | -21.80642 | -17.6272  |
|           | 59.39569  | 2.03685   |           | -21.41552 | -17.72298 |
| <b>8</b>  | 9.58461   | 47.01372  | <b>19</b> | -21.43016 | -14.56685 |
|           | 9.2666    | 47.04732  |           | -21.30144 | -14.55239 |
|           | 9.56883   | 46.79314  |           | -21.40184 | -14.68365 |
|           | 7.49168   | 42.74172  |           | -21.35438 | -14.25368 |
|           | 8.55597   | 45.23342  |           | -21.33524 | -14.23696 |
|           | 8.28298   | 43.43859  |           | -21.43468 | -14.61794 |
| <b>9</b>  | -2.28591  | -4.53816  | <b>20</b> | -12.14648 | -8.71407  |
|           | -2.89204  | -3.48177  |           | -12.17995 | -8.37553  |
|           | -2.99507  | -4.37595  |           | -12.18701 | -9.08584  |
|           | -4.13672  | -3.45031  |           | -11.89329 | -8.45306  |
|           | -1.66947  | -4.62642  |           | -12.09081 | -7.47025  |
|           | -3.57274  | -3.87243  |           | -12.47582 | -8.37634  |
| <b>10</b> | -10.87742 | -13.6552  | <b>21</b> | -15.90399 | -18.42469 |
|           | -12.01716 | -14.79519 |           | -15.79786 | -18.24951 |
|           | -11.14561 | -14.24223 |           | -16.06023 | -18.31443 |
|           | -11.92433 | -14.84376 |           | -16.21588 | -17.94584 |
|           | -11.11541 | -14.55104 |           | -16.24605 | -18.22226 |
|           | -11.67412 | -14.87524 |           | -16.93417 | -17.75877 |
| <b>11</b> | -9.74441  | -9.67023  |           |           |           |
|           | -10.00783 | -10.08103 |           |           |           |
|           | -10.49521 | -9.51835  |           |           |           |
|           | -9.51775  | -9.71651  |           |           |           |
|           | -10.66129 | -9.73772  |           |           |           |
|           | -9.9555   | -9.8006   |           |           |           |

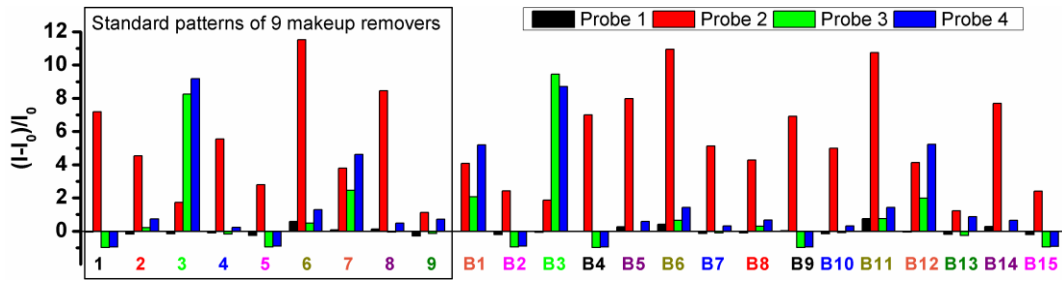

**Fig. S4.** Response of the four-channel sensor array against the 9 known makeup removers (1-9) and the 15 blind makeup remover samples (B1-B15). Same color represents the same brand of makeup remover.

**Table S4.** Identification of the 15 blind makeup remover samples.

| Sample                                | Identification | Verification | Y/N |
|---------------------------------------|----------------|--------------|-----|
| <b>B1</b>                             | #7             | #7           | Y   |
| <b>B2</b>                             | #5             | #5           | Y   |
| <b>B3</b>                             | #3             | #3           | Y   |
| <b>B4</b>                             | #1             | #1           | Y   |
| <b>B5</b>                             | #8             | #8           | Y   |
| <b>B6</b>                             | #6             | #6           | Y   |
| <b>B7</b>                             | #4             | #4           | Y   |
| <b>B8</b>                             | #2             | #2           | Y   |
| <b>B9</b>                             | #1             | #1           | Y   |
| <b>B10</b>                            | #4             | #4           | Y   |
| <b>B11</b>                            | #6             | #6           | Y   |
| <b>B12</b>                            | #7             | #7           | Y   |
| <b>B13</b>                            | #9             | #9           | Y   |
| <b>B14</b>                            | #8             | #8           | Y   |
| <b>B15</b>                            | #5             | #5           | Y   |
| <b>100% identified, 0% error rate</b> |                |              |     |
